# Supplementary material for: Targeting OPA1-Mediated Mitochondrial Fusion Contributed to Celastrol’s Anti-Tumor Angiogenesis Effect
Source: MDPI journal article supplement (doi:10.3390/pharmaceutics15010048), 2022-12-23
Supplement: s1 [file s1]

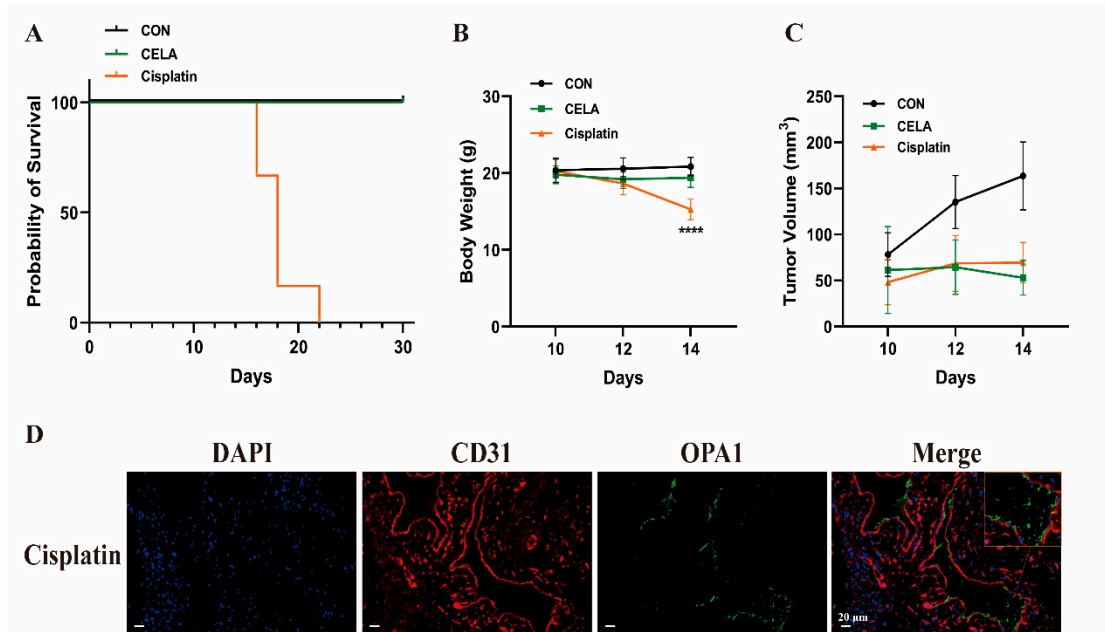

**Figure S1.** Cisplatin administration did not show a significant inhibitory effect on tumor angiogenesis *in vivo*. (a) The survival curve, (b) changes in body weight and (c) changes in tumor volume under celastrol or cisplatin treatment; (d) The expression of CD31 and OPA1 in tumor tissues after 12 day's cisplatin administration. \*\*\*\*p < 0.0001.

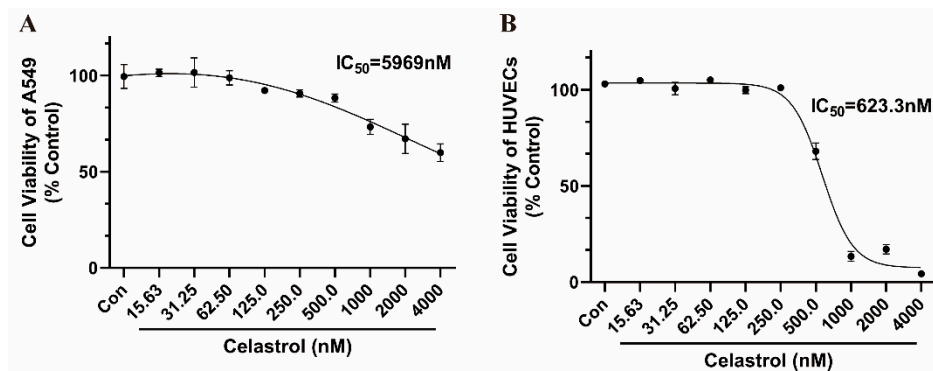

**Figure S2.** (a), (b) Cell viability of A549 and HUVECs after 24 h celastrol treatment.
